# 1                    **Preclinical model for the study of immune responses** 2                    **specific for a hepatic self-antigen**

3  
4                    Anaïs Cardon<sup>1</sup>, Jean-Paul Judor<sup>1</sup>, Thomas Guinebretière<sup>1</sup>, Richard Danger<sup>1</sup>,  
5                    Arnaud Nicot<sup>1</sup>, Sophie Brouard<sup>1</sup>, Sophie Conchon<sup>1†</sup> and Amédée Renand<sup>1†\*</sup>  
6

7                    <sup>1</sup> Nantes Université, INSERM, CHU Nantes, Center for Research in Transplantation and  
8                    Translational Immunology, UMR 1064, ITUN5, F-44000 Nantes,

9                    <sup>†</sup> Equal contribution

10                    \* Corresponding author : Dr Amédée Renand, INSERM UMR1064 – Center for Research in  
11                    Transplantation and Translational Immunology, CHU Nantes – Hôtel Dieu, 30 boulevard Jean  
12                    Monnet, 44093, Nantes Cedex 01, France. Phone: (+33)240087410. E-mail address:  
13                    [amedee.renand@univ-nantes.fr](mailto:amedee.renand@univ-nantes.fr)  
14  
15

## 16                    **Abstract :**

17                    The liver displays a strong capacity to induce tolerance toward hepatic antigens. However,  
18                    hepatic tolerance can be overcome with the development of local autoimmune diseases such  
19                    as autoimmune hepatitis (AIH). This chronic inflammatory disorder leads to a progressive  
20                    destruction of liver parenchyma if non-treated. Although the CD4<sup>+</sup> T cell response seems a key  
21                    player of this immune disorder, the dynamics and biology of emerging liver antigen-specific  
22                    CD4<sup>+</sup> T cells are poorly described. Here, we developed a new murine model which mimics  
23                    hepatic autoreactivity allowing the study and monitoring of antigen-specific CD4<sup>+</sup> T cells from  
24                    their emergence to local immune response. We show that the induction of the expression of  
25                    an antigen in the liver in non-inflammatory condition leads to antigen tolerance. In inflammatory  
26                    condition, using viral vector transduction, we observe the development of a complete adaptive  
27                    immune response concomitant with the antigen expression in the liver. The presence of  
28                    antigen-specific CD4<sup>+</sup> T cells in the liver is associated to transient hepatic damages.  
29                    Interestingly, the neo-antigen expression by hepatocytes after peripheral immunisation  
30                    induces the recruitment of antigen-specific CD4<sup>+</sup> T cells and hepatic damages. These data  
31                    demonstrate that the recruitment of antigen-specific CD4<sup>+</sup> T cells in the liver is conditioned by  
32                    an immune coordination between surface antigen expression by hepatocytes and peripheral  
33                    immune response and mimics the first step of a local autoreactive process. In the long-term,

34 we observe that the hepatic environment has the capacity to control the local, but not the  
35 systemic, antigen-specific CD4<sup>+</sup> T cells. Additional immune events might be involved in the  
36 long-term chronic immune reactivity in the liver, following the first steps described in this study.

37

38

39 **Keywords :**

40 Autoimmune hepatitis, autoreactive CD4<sup>+</sup> T cells, liver, tolerance

41

42

43 **Key points :**

- 44 • Antigen expression in the liver in non-inflammatory condition leads to antigen tolerance
- 45 • Antigen expression in the liver in immunization condition (concomitant or pre-existing)
- 46 is sufficient to induce liver recruitment of antigen-specific CD4<sup>+</sup> T cells and hepatic
- 47 damages
- 48 • This model mimics the first step of an autoreactive process against a liver antigen
- 49 • In the long-term, the hepatic environment induces a local tolerance toward the antigen
- 50 expression and the clearance of liver-infiltrating, but not peripheral, antigen-specific
- 51 CD4<sup>+</sup> T cells
- 52 • This new murine model can be of interest for the analysis of the immunomodulatory
- 53 pathways implicated in liver tolerization of autoreactive CD4<sup>+</sup> T cells and identification
- 54 of potential extrinsic factors implicated in an acute-to-chronic transition as observed
- 55 during autoimmune hepatitis

## 56 Introduction

57

58 The liver displays strong tolerogenic properties mediated by both parenchymal hepatocytes  
59 and non-parenchymal cells (NPCs). These cells, particularly liver sinusoidal endothelial cells,  
60 Kupffer cells and hepatocytes, are able to act as antigen presenting cells to promote activation  
61 of T cells<sup>1</sup>. In normal condition, this activation leads to an anergic phenotype<sup>2,3</sup>, differentiation  
62 into regulatory T cells (Tregs)<sup>4,5</sup> or even apoptosis<sup>6,7</sup>.

63 However, the robust liver capacity to induce tolerance can be overcome leading to the  
64 development of autoimmunity. Autoimmune hepatitis (AIH) is a chronic inflammatory disorder  
65 causing a progressive destruction of liver parenchyma<sup>8</sup>. It is a rare worldwide disease with a  
66 prevalence of 16.9 per 100,000 in Europe and North America and an incidence of 0.1 to 1.9  
67 per 100,000 per year<sup>9</sup>. This pathology is characterized by the presence of autoantibodies,  
68 elevated immunoglobulin G (IgG) level in the sera of patients, and a typical histological feature  
69 in the liver, the interface hepatitis. This important lymphocytic infiltration in the liver is  
70 composed mainly of CD4<sup>+</sup> T cells but also of CD8<sup>+</sup> T cells and B cells<sup>8</sup>. AIH is divided into two  
71 types, depending on autoantibodies present in patients' blood : type 1 AIH (anti-nuclear  
72 antibodies, anti-smooth muscle antibodies and anti-soluble liver antigen – SLA – antibodies)  
73 and type 2 AIH (anti-liver kidney microsomal type 1 – LKM-1 – antibodies and anti-liver cytosol  
74 – LC-1 – antibodies). AIH is a multifactorial disease associating genetic predispositions,  
75 affecting genes coding for class II molecules of the major histocompatibility complex (MHC-II),  
76 and environmental factors, such as drug exposure and molecular mimicry<sup>8</sup>. Patients are  
77 treated with immunosuppressive drugs (prednisolone associated or not with azathioprine) but  
78 struggle to reach long-term remission<sup>10,11</sup>.

79 Preponderance of CD4<sup>+</sup> T cells in the hepatic infiltrate, genetic predisposition affecting  
80 genes coding for MHC-II molecules, involved in antigen presentation to CD4<sup>+</sup> T cells, and  
81 accumulation of autoantibodies, generated after interaction between B cells and CD4<sup>+</sup> T cells,  
82 point toward a major role of autoreactive CD4<sup>+</sup> T cells in the immunopathogenesis of AIH. Data  
83 obtained in AIH patients show an enrichment of pro-inflammatory CD4<sup>+</sup> T cells in liver and  
84 blood and defective regulatory mechanisms<sup>8,12</sup>. Particularly, frequencies of pro-inflammatory  
85 Th1 and Th17 cells and their related cytokines (IFN- $\gamma$ , TNF- $\alpha$ , IL-17) are increased in  
86 patients<sup>13-15</sup>. Whether patients present quantitative and/or qualitative CD4<sup>+</sup> Tregs defects is

87 still debated<sup>15–18</sup>. Recently, our team observed that, despite immunosuppressive treatment,  
88 AIH patients display a persistent immune dysregulation in their blood with a residual CD4<sup>+</sup> T  
89 cell infiltrate in the liver<sup>12</sup>. By tracking SepSecs-specific CD4<sup>+</sup> T cells in patients with anti-SLA  
90 antibodies, we identified and provided a deep characterization of a unique autoreactive CD4<sup>+</sup>  
91 T cell population with a pro-inflammatory/B-helper profile (PD-1<sup>+</sup> CXCR5<sup>-</sup> CCR6<sup>-</sup> CD27<sup>+</sup>  
92 IL-21<sup>+</sup>). This subset is enriched in the blood of AIH patients independently of the presence of  
93 the anti-SLA antibodies<sup>19</sup>, and it represents the major reservoir of autoreactive CD4<sup>+</sup> T cells in  
94 patients. Therefore, the tracking of these cells associated to the analysis of the mechanisms  
95 involved in their emergence could provide new therapeutical target for AIH treatment.

96 As diagnosis generally occurs quite late after disease onset, and because AIH is a chronic  
97 disease with long-term evolution, the study of the early events implicated in the autoreactive  
98 CD4<sup>+</sup> T cells generation cannot be performed in patients, thus murine models represent  
99 valuable tools for this purpose. Murine models of AIH, based on immunisation using viral  
100 vectors encoding for human CYP2D6 or FTCD proteins<sup>20,21</sup>, have underlined the importance  
101 of molecular mimicry and genetic susceptibility for the development of murine AIH. However,  
102 emergence and biology of antigen-specific autoreactive CD4<sup>+</sup> T cells involved in the first steps  
103 of the adaptive immune response against an autoantigen expressed in the liver have not been  
104 studied. In this study, we propose a new murine model which mimics hepatic autoreactivity. In  
105 this model, we can induce hepatic expression of a model antigen, hemagglutinin (HA), in  
106 different conditions and follow the emergence of antigen-specific responses, especially  
107 antigen-specific CD4<sup>+</sup> T cells.

108 **Methods**

109

110 **Viral vectors**

111 Adenoviral CAG Cre vectors (Ad Cre) were produced with a vector plasmid containing the  
112 Cre recombinase coding sequence inserted behind the CAG promoter and followed by a  
113 poly-A signal. Control adenoviral CMV GFP vector (Ad Ct) consisted of the GFP coding  
114 sequence inserted between the CMV promoter and a poly-A signal.

115 Ad Cre and Ad Ct productions were performed by the INSERM UMR 1089 Centre de  
116 Production de Vecteurs (Nantes, France).

117

118 **Mice**

119 Heterozygous TTR-Cre inducible mice ( $Cre^{ind/+}$ )<sup>22</sup> were back-crossed on a Balb/c  
120 background for at least 10 generations (TAAM, CDTA CNRS Orléans). They were cross-bred  
121 with homozygous Rosa26 HA floxed mice ( $HA^{fl}$ )<sup>23</sup> resulting in  $HA^{fl}/Cre^{ind-}$  mice and  $HA^{fl}/Cre^{ind+}$   
122 mice. Male and female eight to twelve-week-old mice were used for each experiment. All mice  
123 were housed at the UTE IRS-UN animal facilities (Nantes, France) where they were fed *ad*  
124 *libitum* and allowed continuous access to tap water. Procedures were approved by the regional  
125 ethical committee for animal care and use and by the Ministère de l'enseignement supérieur  
126 et de la recherche (agreements APAFIS #2054 and #28582). All experiments were performed  
127 in accordance with relevant guidelines and regulations.

128 For the induction of HA expression in hepatocytes in non-inflammatory condition, normal  
129 diet of  $HA^{fl}/Cre^{ind-}$  mice (control) and  $HA^{fl}/Cre^{ind+}$  mice were substituted by tamoxifen dry food  
130 (0.5g/kg tamoxifen + 5% saccharose; Safe, France) for 14 days in free access.

131 For the induction of HA expression in hepatocytes in inflammatory condition,  $HA^{fl}/Cre^{ind-}$   
132 mice and  $HA^{fl}/Cre^{ind+}$  mice were injected intravenously with  $3 \times 10^9$  ip (infectious particle) per  
133 mice of the Ad Cre vector or of the Ad Ct vector for the control group.

134 For the peripheral immunization against HA, mice  $HA^{fl}/Cre^{ind-}$  mice and  $HA^{fl}/Cre^{ind+}$  mice  
135 were injected intramuscularly with  $1.5 \times 10^9$  ip per mice of the Ad Cre vector or of the Ad Ct  
136 vector for the control group.

137

138

## 139 **Genotyping**

140 Small tail biopsies were taken from 3 week-old mice to perform Cre genotyping. Briefly,  
141 samples were digested overnight at 56°C in 100µL of TNT-PK buffer (TNT : Tris HCl pH 8.5  
142 50mM ; NaCl 100mM ; Tween 20 0.5% / proteinase K 0.2mg/mL). PK were inactivated at 95°C  
143 during 15min. 60ng of DNA was used for PCR mix reaction prepared according to the  
144 manufacturer protocol (Herculase II Fusion DNA Polymerase, Agilent). The following Cre  
145 primers were used to carry out the PCR amplification: forward primer  
146 5'-CCTGGAAAATGCTTCTGTCCG-3', reverse primer 5'-CAGGGTGTATAAGCAATCCC-3'.  
147 Amplification program was run on a Veriti Thermal Cycler (Applied Biosystems; Foster City,  
148 USA) and consist of 1 cycle at 95°C for 2min, 35 cycles of 95°C for 20sec, 60°C for 20sec and  
149 72°C for 30sec, followed by 1 cycle at 72°C for 3min. Finally, PCR products are visualized on  
150 Caliper LabChip (PerkinElmer).

151

## 152 **RNA extraction, reverse transcription and quantitative PCR**

153 Total RNA was extracted from organ tissue using TRIzol™ reagent (ThermoFisher Scientific  
154 #15596026) and purified with the QiagenRNeasy Mini Kit (Qiagen #74106) according to the  
155 manufacturer's protocol.

156 Reverse transcription was performed using 2µg of total RNA mixing with poly-dT24  
157 20µg/mL (Eurofins Genomics), DTT 8mM (ThermoFisher Scientific #18057018) and dNTP  
158 20mM (ThermoFisher Scientific #10297018) and incubated at 70°C during 10min followed by  
159 4°C for 5min. Then, first strand buffer 1X (ThermoFisher Scientific #18057018), M-MLV  
160 reverse transcriptase 200U (ThermoFisher Scientific #18057018) and RNase OUT inhibitor  
161 40U (ThermoFisher Scientific #10777019) were added and incubated at 37°C for 1h, followed  
162 by 15min at 70°C.

163 Real-time RT-PCR was performed using the ViiA™ 7 Real-Time PCR System and Power  
164 SYBR™ Green PCR Master Mix (ThermoFisher Scientific #4368708). Primers for HA (forward  
165 5'-AAACTCTTCGCGGTCTTTCCA-3'; reverse 5'-GATAAGGTAGCTTGGGCTGC-3') and  
166 β-actine (forward 5'-TACCACAGGCATTGTGATGG-3'; reverse  
167 5'-AATAGTGATGACCTGGCCGT-3') were used for detection. Relative gene expressions  
168 were calculated by the  $2^{-\Delta\Delta Ct}$  method.

169

## 170 **Western blot**

171 Total proteins were extracted from liver samples via RIPA buffer treatment. 25µg of protein  
172 were denatured at 95°C for 5min in Laemmli Sample Buffer (BIORAD #1610747) with DTT  
173 0.1M. Preparation was separated by SDS-PAGE on Mini-PROTEAN TGX Precast Protein Gels  
174 (BIORAD #4561036) in migration buffer (Tris base 15g/l, glycine 72g/l, SDS 10g/l) and  
175 transferred onto a PVDF membrane with the Trans-Blot Turbo Transfer System (BIORAD).  
176 The membrane was blocked using a blocking solution (TBS; Tween 20 0.1%; skim milk 5%)  
177 for 2h then incubated with primary antibodies (1:5000) overnight : anti-HA antibody (rabbit  
178 polyclonal antibody; Sinobiological #11684-T62) and anti-β-actin antibody (mouse monoclonal  
179 antibody; Cell Signaling #3700). The membrane was washed with TBS – Tween 20 0.1%.  
180 HRP-conjugated donkey anti-rabbit IgG (H+L) (1:5000; Cliniscience #E-AB-1080-120) and  
181 HRP-conjugated goat anti-mouse IgG + IgM (H+L) (1:10000; Jackson ImmunoResearch  
182 #115-036-068) were used to detect rabbit and mouse antibodies respectively during 1h.  
183 Secondary antibodies were detected using electrochemiluminescence super signal West Pico  
184 (ThermoFisher Scientific #34577) according to the manufacturer instructions. Imaging and  
185 analysis of western blots were performed on the ChemiDoc MP Imaging System (BIORAD).

186

## 187 **Cell preparation**

188 Splenocytes were isolated by a mechanical dissociation of spleen in red blood cell lysis  
189 buffer (NH<sub>4</sub>Cl 155mM; KHCO<sub>3</sub> 10mM; EDTA 1mM; Tris 17mM per 1L of sterilized water) before  
190 centrifugation.

191 Liver non-parenchymal cells (NPCs) were isolated as previously described<sup>24</sup>. Briefly, after  
192 perfusion with HBSS 1X buffer (ThermoFisher Scientific #14175129), livers were digested with  
193 collagenase IV (Sigma-Aldrich #C5138) and NPCs enriched by Percoll (Sigma-Aldrich #GE17-  
194 0891-01) density gradient centrifugation and red blood cells lysis.

195

## 196 **Tetramer enrichment and staining**

197 20.10<sup>6</sup> splenocytes and 3.10<sup>6</sup> NPCs were stained with both I-A<sup>d</sup>-HA peptide  
198 (HNTNGVTAACSHE) and I-E<sup>d</sup>-HA peptide (SFERFEIFPKE) PE-labelled tetramers (NIH  
199 Tetramer Core Facility; Atlanta, USA) at room temperature during 1h. Then, cells were washed  
200 using PBE buffer (PBS 1X; BSA 0.1%; EDTA 2mM) and stained with magnetic anti-PE

201 microbeads (Miltenyi #130-048-801) at 4°C during 15min. Cells were washed and enriched  
202 using magnetic MS columns (Miltenyi #130-042-201). A viability staining was then performed  
203 on the positive fraction containing tetramer-enriched cells by incubating cells with 100µL of  
204 LIVE/DEAD™ Fixable Aqua Dead Cell Stain kit (ThermoFisher Scientific #L34957) for 15min  
205 at 4°C, protected from light. Cells were washed and an extracellular staining were performed  
206 using 100µL of fluorescent antibodies for 20min at 4°C, protected from light. For FoxP3  
207 intracellular staining, cells were next permeabilized and fixed for 30min according to the  
208 eBioscience™ Foxp3/Transcription Factor Staining Buffer Set (ThermoFisher Scientific  
209 #00-5523-00). Fluorescent antibodies targeting the FoxP3 marker were diluted in the  
210 permeabilization buffer and incubated with the fixed cells for 1h, protected from light.

211 The following antibodies were used to perform an extracellular staining: CD4/PerCP-Cy5.5  
212 (clone RM4-5; BD #550954), CD44/APC (clone IM7; BD #559250), PD-1/BV421 (clone J43;  
213 BD #562584), CD25/PE-Cy7 (clone PC61; BD #552880) and CD19/BV510 (clone ID3;  
214 BD #562956). For the intracellular staining, the FoxP3/AF488 (clone FJK16S, eBioscience  
215 #53-5773-82) antibody was used. HA-specific CD4<sup>+</sup> T cells were defined as : LIVE/DEAD<sup>-</sup>  
216 CD19<sup>-</sup> CD4<sup>+</sup> CD44<sup>high</sup> tetramers<sup>+</sup> cells.

217 For cell phenotyping, fluorescence was measured with a BD FACS Canto II (BD  
218 Biosciences; Mountain View, USA). FlowJo software was used to analyze data after  
219 eliminating doublets and viability<sup>+</sup> dead cells.

220

## 221 **ELISA test**

222 For the detection of anti-HA antibodies, wells were coated with HA protein 1µg/mL (Sino  
223 Biological #11684-V08H) diluted in coating buffer (Na<sub>2</sub>CO<sub>3</sub> 0.05M; NaHCO<sub>3</sub> 0.05M; pH 9.2)  
224 and incubated at 4°C overnight. Wells were then washed with washing buffer (PBS 1X; Tween  
225 20 0.05%; in distilled water) and saturated with dilution buffer (PBS 1X; Tween 20 0.05%; BSA  
226 1%; in distilled water) for 2h at 37°C. After washing, diluted sera samples (1:500) were added  
227 and incubated at 37°C during 2h. Wells were washed and diluted peroxidase goat anti-mouse  
228 IgG+IgM (H+L) detection antibody (1:2000; Jackson ImmunoResearch #115-036-068) was  
229 added before incubating at 37°C for 1h. Finally, wells were incubated with TMB Substrate  
230 Reagent (BD #555214) and reaction was stopped with H<sub>2</sub>SO<sub>4</sub> 0.5M. The absorbance at 450nm  
231 was determined using a Spark® 10M Infinite M200 Pro plate reader (TECAN).



232 **Transaminase dosage and histology**

233 Dosage of plasma levels of aspartate aminotransferase (AST) and alanine  
234 aminotransferase (ALT) was performed by the Centre Hospitalier Universitaire of Nantes  
235 (France).

236 Histological analyses were performed on paraformaldehyde (PFA)-fixed/paraffin-embedded  
237 liver samples. Liver lobes were fixed in PFA 4% for 24h at room temperature. Samples were  
238 then dehydrated in absolute ethanol then cleared in isopropanol and finally included paraffin.  
239 Paraffin-embedded sections (3 $\mu$ m) were stained with hematoxylin-phloxine-saffron (HPS).  
240 Paraffin-embedding and HPS staining were performed by the IBISA MicroPICell facility  
241 (Biogenouest; Nantes, France). Slides were observed using NanoZoomer (HAMAMATSU) and  
242 NDP Scan software.

243

244 **Statistical analysis**

245 Prism (GraphPad version 6.01 Software, Inc.) was used for statistical analyses. Group  
246 comparison analyses were assessed using non-parametric Kruskal-Wallis tests or one-way  
247 ANOVA statistical test. p values < 0.05 were considered statistically significant between two  
248 groups (\* = p <0.05, \*\* = p <0.01, \*\*\* = p <0.001, \*\*\*\* = p < 0.0001).

## 249 **Results**

250

### 251 **Concomitant inflammation and antigen expression in the liver induce a local** 252 **recruitment of antigen-specific CD4<sup>+</sup> T cells with increased hepatic damages.**

253 In order to analyse the dynamics of the emergence of liver antigen-specific CD4<sup>+</sup> T cells,  
254 we used a liver-restricted HA expression model and tracked HA-specific CD4<sup>+</sup> T cells with  
255 specific MHC class II tetramers.

256 We developed two strategies of induction of the expression of the HA antigen in the liver,  
257 based on the Cre/LoxP system. Homozygous Rosa26 HA floxed (HA<sup>fl</sup>) mice were crossed with  
258 heterozygous TTR-Cre inducible (Cre<sup>ind</sup>) mice, expressing an inducible Cre recombinase under  
259 the control of the hepatocyte-specific promotor (transthyretin, TTR). Both strains were on  
260 Balb/c (H-2<sup>d</sup>) background. The feeding of the HA<sup>fl</sup>/Cre<sup>ind+</sup> offspring with tamoxifen-mixed dry  
261 food leads to the expression of HA at the surface of the hepatocytes under non-inflammatory  
262 condition. The second strategy consists in the intravenous (i.v.) injection to all offspring  
263 (HA<sup>fl</sup>/Cre<sup>ind-</sup> and HA<sup>fl</sup>/Cre<sup>ind+</sup>) of an adenoviral vector encoding for the Cre recombinase  
264 (Ad Cre), which transduces preferentially hepatocytes due to its strong hepatic tropism. This  
265 results in the expression of HA at the surface of hepatocytes under inflammatory condition,  
266 bypassing the endogenous expression of the inducible Cre in mice. As control, a peripheral  
267 model of immunization by intramuscular (i.m.) injection of Ad Cre which only induces local HA  
268 expression in the muscle was used (Figure 1A).

269 After two weeks, the HA expression restricted to the liver can be detected both in tamoxifen-  
270 fed HA<sup>fl</sup>/Cre<sup>ind+</sup> mice and in Ad Cre i.v.-injected HA<sup>fl</sup>/Cre<sup>ind-</sup> and HA<sup>fl</sup>/Cre<sup>ind+</sup> mice (termed as  
271 HA<sup>fl</sup>/Cre<sup>ind-/+</sup> mice) (Figure 1B, Supplementary figure 1, Supplementary figure 2). Expression of  
272 HA in Ad Cre i.m. mice was restricted to the muscle. In control tamoxifen-fed HA<sup>fl</sup>/Cre<sup>ind-</sup> mice  
273 and Ad Ct i.v. or i.m. groups, no expression of HA was observed in the liver and in any other  
274 organs (Figure 1B, Supplementary figure 1, Supplementary figure 2).

275 As expected, when mice are immunized by i.m. injection of Ad Cre, the induction of HA  
276 expression in the muscle in this inflammatory condition leads to the generation of a HA-specific  
277 humoral response, as demonstrated by the presence of anti-HA IgG and IgM (81.65 ±  
278 5.72 arbitrary units, a.u.) (Figure 1C, Supplementary figure 2). Interestingly, in Ad Cre i.v. mice,  
279 the hepatic expression of HA under inflammatory condition leads to a comparable HA-specific

280 humoral response ( $89.00 \pm 4.95$  a.u.). On the contrary, tamoxifen fed HA<sup>fl</sup>/Cre<sup>ind+</sup> mice did not  
281 develop humoral HA-specific response, despite hepatic expression of HA. No anti-HA specific  
282 antibodies were detected in control mice (tamoxifen-fed HA<sup>fl</sup>/Cre<sup>ind-</sup> mice and Ad Ct i.v. or i.m.  
283 mice) (Figure 1C, Supplementary figure 2).

284 The HA-specific CD4<sup>+</sup> T cell response was tracked with MHC class II tetramer loaded with  
285 HA peptides. HA-specific CD4<sup>+</sup> T cells were detected neither in the spleen nor in the liver of  
286 tamoxifen-fed HA<sup>fl</sup>/Cre<sup>ind+</sup> mice (Figure 1D). However, HA-specific CD4<sup>+</sup> CD44<sup>high</sup> T cells were  
287 detected in the spleen of both Ad Cre i.m. mice (frequency per 10<sup>6</sup> cells:  $6.33 \pm 4.27$ ) and Ad  
288 Cre i.v. mice (frequency per 10<sup>6</sup> cells:  $21.77 \pm 14.68$ ), while none were detected in their  
289 respective control (Ad Ct) (Figure 1D, Supplementary figure 2). Liver HA-specific CD4<sup>+</sup>  
290 CD44<sup>high</sup> T cells were detected only in Ad Cre i.v. mice (frequency per 10<sup>6</sup> cells:  $23.50 \pm 28.38$ )  
291 (Figure 1D, Supplementary figure 2). This data demonstrates that our model allows the  
292 generation of a complete adaptive immune response against a liver antigen under  
293 inflammatory condition with local recruitment of antigen-specific CD4<sup>+</sup> T cells.

294 However, the liver has strong tolerogenic properties, which have been shown to involve the  
295 induction of regulatory T cells. To understand if our model induces the generation/expansion  
296 of regulatory CD4 T cells or of pro-inflammatory CD4 T cells, we performed a comparison of  
297 the immune phenotype of the HA-specific CD4<sup>+</sup> CD44<sup>high</sup> T cells isolated from Ad Cre i.v. vs  
298 Ad Cre i.m. mice. This analysis revealed that these HA-specific CD4<sup>+</sup> T cells are CD25<sup>-</sup> FoxP3<sup>-</sup>  
299 in both groups, but that those from Ad Cre i.v. mice contain a higher proportion of PD-1<sup>+</sup>  
300 (CD279) cells (spleen:  $88.98 \pm 13.41\%$ ; liver:  $81.11 \pm 28.29\%$ ) than those isolated from Ad Cre  
301 i.m. mice (spleen:  $41.12 \pm 22.21\%$ ) (Figure 1E, Supplementary figure 3). PD-1<sup>+</sup> cells were  
302 enriched in HA-specific CD4<sup>+</sup> T cells compared to total memory CD4<sup>+</sup> CD44<sup>high</sup> T cells from the  
303 same condition (Supplementary figure 4). This PD-1 up-regulation, rather the Foxp3  
304 expression, could reflect a high antigen reactivity and suggest the emergence of pro-  
305 inflammatory CD4 T cells.

306 Plasma levels of aminotransferases (AST/ALT) were used to monitor liver damage. In  
307 tamoxifen-fed mice and Ad Ct/Ad Cre i.m. groups, AST/ALT levels remained stable for 14 days  
308 and histological analysis of the liver did not show any sign of lymphocytic infiltration (Figure  
309 1F). When adenoviral vectors (Cre or Ct) are injected intravenously, plasma AST/ALT levels  
310 were increased, with a peak after 7 days reflecting liver inflammation due to viral infection

311 (Figure 1F). Interestingly, the histological analysis of the liver showed that portal infiltrations  
312 and liver damages were more severe in the liver of Ad Cre i.v. mice than in Ad Ct i.v. mice.  
313 Liver of Ad Cre i.v. mice showed many events of hepatocyte necrosis and a necroinflammatory  
314 activity (Figure 1F). Therefore, although the adenoviral vector itself induces a hepatic  
315 inflammation, the presence of HA-specific CD4<sup>+</sup> CD4<sup>high</sup> T cells associated with HA expression  
316 in the liver of Ad Cre i.v. mice could explain the exacerbated liver damages compared to Ad  
317 Ct i.v. mice.

318 Thus, the induction of the hepatic expression of the antigen HA in association with a  
319 concomitant adenoviral-mediated hepatic inflammation leads to the development of an  
320 antigen-specific response, marked by the generation of anti-HA antibodies and HA-specific  
321 CD4<sup>+</sup> CD44<sup>high</sup> PD-1<sup>+</sup> T cells in the spleen and the liver. The presence of HA-specific CD4<sup>+</sup>  
322 CD44<sup>high</sup> PD-1<sup>+</sup> T cells in the liver is associated with increased hepatic inflammation and liver  
323 damages, which could be explained by an immune attack against the HA-expressing  
324 hepatocytes, mimicking the early events of an autoreactive response.

325

### 326 **Antigen expression in the liver post-peripheral immunization leads to intra-hepatic** 327 **recruitment of antigen-specific CD4<sup>+</sup> T cells**

328 HA-specific CD4<sup>+</sup> T cells are observed in the liver of mice only after Ad Cre i.v. injection,  
329 but, it was not clear if these cells are generated within the liver or recruited from the periphery.  
330 We hypothesized that peripherally activated HA-specific memory T cells could be recruited to  
331 the liver following local HA expression and mediate local damages. For this, we analysed the  
332 consequences of a tamoxifen-induced hepatic expression of the antigen HA in peripherally  
333 pre-immunized mice. HA<sup>fl</sup>/Cre<sup>ind-</sup> and HA<sup>fl</sup>/Cre<sup>ind+</sup> mice were immunized by a single i.m.  
334 injection of Ad Cre. After 14 days, mice were fed with tamoxifen dry food for 14 days (Figure  
335 2A).

336 As expected, tamoxifen induced HA expression only in the liver of HA<sup>fl</sup>/Cre<sup>ind+</sup> mice (Figure  
337 2B). HA-specific CD4<sup>+</sup> CD44<sup>high</sup> T cells were detected in spleen of all groups of mice at similar  
338 frequencies (per 10<sup>6</sup> cells: 8.75 ± 2.63 in HA<sup>fl</sup>/Cre<sup>ind-</sup> mice; 8.50 ± 7.18 in HA<sup>fl</sup>/Cre<sup>ind+</sup> mice),  
339 which confirms that all mice were indeed pre-immunized (Figure 2C). Tamoxifen induction of  
340 HA hepatic expression only in HA<sup>fl</sup>/Cre<sup>ind+</sup> mice leads to a massive hepatic infiltration of HA-  
341 specific CD4<sup>+</sup> CD44<sup>high</sup> T cells in 50% of these mice (per 10<sup>6</sup> cells: 89.67 ± 131.10 in liver-

342 infiltrated HA<sup>fl</sup>/Cre<sup>ind+</sup> mice, vs  $4.83 \pm 3.66$  in non-infiltrated HA<sup>fl</sup>/Cre<sup>ind+</sup> mice and  $4.50 \pm 1.73$  in  
343 HA<sup>fl</sup>/Cre<sup>ind-</sup> mice) (Figure 2C). In the infiltrated liver of HA<sup>fl</sup>/Cre<sup>ind+</sup> mice, HA-specific CD4<sup>+</sup>  
344 CD44<sup>high</sup> PD-1<sup>+</sup> T cells were enriched compared to their splenic counterpart (spleen:  $18.06 \pm$   
345  $13.11\%$ ; liver:  $62.13 \pm 23.49\%$ ) (Figure 2D), while frequency of splenic and hepatic total  
346 memory CD4<sup>+</sup> CD44<sup>high</sup> PD-1<sup>+</sup> T cells were still low (Supplementary figure 5). A hepatitis was  
347 associated with this antigen-specific immune response in liver-infiltrated HA<sup>fl</sup>/Cre<sup>ind+</sup> mice, as  
348 shown by the increase in AST/ALT levels after HA hepatic expression induction (Figure 2E)  
349 and a residual diffuse infiltrate in the liver at the end of experiment (Supplementary figure 6).  
350 The humoral response, as measured by serum levels of anti HA IgG/IgM was comparable in  
351 mice of all groups at the end of the experiment. However, it is noteworthy that the mice that  
352 developed hepatitis associated with presence of liver HA-specific CD4<sup>+</sup> T cells after tamoxifen  
353 diet are those in which the pre-immunisation had led to the weakest humoral immune response  
354 (HA<sup>fl</sup>/Cre<sup>ind+</sup> mice:  $92.25 \pm 12.87$  a.u. in non-infiltrated;  $61.60 \pm 22.32$  a.u. in liver-infiltrated)  
355 (Figure 2F).

356 Thus, the expression of an antigen in the liver under pre-immunization condition is a factor  
357 to induce a local HA-specific CD4<sup>+</sup> T cells recruitment associated to hepatitis, explaining the  
358 presence of HA-specific CD4<sup>+</sup> T cells in the liver after i.v. Ad Cre infection as shown in  
359 Figure 1. These data also suggest that a weak pre-immunisation may be necessary to induce  
360 this local recruitment.

### 361 362 **Hepatic antigen expression induced by an adenovirus leads to a long-term peripheral** 363 **antigen-specific response but local liver tolerance**

364 In the first part of this work, we studied the first event involved in the generation and  
365 recruitment of HA-specific CD4<sup>+</sup> T cell in the liver. However, liver autoimmunity is a long-term  
366 chronic disease in human. Thus, HA<sup>fl</sup>/Cre<sup>ind/+</sup> mice received either a unique i.v. injection of Ad  
367 Cre or of Ad Ct and were monitored for 24 weeks (Figure 3A).

368 24 weeks after i.v. injection of Ad Cre, expression of HA was still detectable in the liver  
369 (Figure 3B). Rapidly the hepatic damages are controlled in our mouse models. The peak of  
370 AST/ALT transaminases plasma levels observed at 1 week decreased to return to a basal level  
371 after 8 weeks (Ad Ct i.v.:  $124.96 \pm 71.69$  UI/L; Ad Cre i.v.:  $133,23 \pm 83,66$  UI/L) (data not  
372 shown). Likewise, liver infiltration and damages in Ad Cre i.v. mice decreased and were

373 resolved after 4 weeks (Figure 3C). This is also associated with a decrease of HA-specific  
374 CD4<sup>+</sup> T cells in the liver which suggest a local clearance over time (Figure 3E).

375 Interestingly, the global peripheral HA-specific adaptive immune response was only mildly  
376 impacted by the persistent HA expression in the liver. Anti-HA IgG and IgM were still detectable  
377 24 weeks after injection, with a plateau reached after 8 weeks (Figure 3D). HA-specific CD4<sup>+</sup>  
378 CD44<sup>high</sup> T cells in Ad Cre i.v. mice were still detectable in the spleen at 24 weeks (Figure 3E).  
379 Long-lasting HA-specific CD4<sup>+</sup> CD44<sup>high</sup> T cells were still CD25<sup>-</sup> PD-1<sup>+</sup>, although frequency of  
380 PD-1<sup>+</sup> cells decreased 2 weeks after Ad Cre injection (Figure 3F, Supplementary figure 7,  
381 Supplementary figure 8).

382 These data demonstrate a local HA-tolerance over time, but a limited impact on the  
383 peripheral pool of antigen-specific CD4<sup>+</sup> T cells. The persistence of a peripheral pool of reactive  
384 CD4<sup>+</sup> T cells could be involved in the chronic inflammatory events with the implication of other  
385 additional immune events.

386

## 387 **Discussion**

388 In this study, we report that the induction of the expression of a model antigen by  
389 hepatocytes in non-inflammatory condition leads to antigen tolerance. The addition of an  
390 inflammatory cue, with an adenoviral vector, is sufficient to overcome immune tolerance and  
391 provoke hepatic local antigen reactivity. This leads to the generation of antigen-specific CD4<sup>+</sup>  
392 T cells in the spleen and in the liver and is associated with mild liver damages which mimics a  
393 possible first step of local autoreactivity.

394 The different murine models of type 2 AIH directly target autoantigen expression in the liver  
395 using i.v. injection of an adenoviral vector encoding human FTCD or human CYP2D6. This  
396 leads to induction of an autoreactive response characterized by an antibody production and  
397 an hepatitis mediated by Th1 and Th17 cells<sup>20,21</sup>. While these models directly target the  
398 autoantigen via a mechanism of molecular mimicry, they lack in depth characterization of the  
399 antigen-specific T cell responses. Here, using an indirect antigen induction method  
400 (Ad Cre leading to HA expression), first we demonstrate that the expression of a neo-antigen  
401 in the liver in an immune-enhanced environment caused by an adenoviral vector is sufficient  
402 to generate an antigen-specific response, and second this response is marked by the  
403 generation of specific antibodies and antigen-specific CD4<sup>+</sup> T cells in the spleen and in the  
404 liver. As for FTCD and CYP2D6 murine models, the presence of antigen-specific CD4<sup>+</sup> T cells  
405 in the antigen-expressing liver in our model is associated with hepatic inflammation and hepatic  
406 damages, suggesting the initiation of an autoreactive response. This confirms that our murine  
407 models are accurate tools to further study the early events implicated in the generation of  
408 autoreactive CD4<sup>+</sup> T cells in AIH.

409 Using two different models of induction of hepatic antigen expression, we show that antigen  
410 expression in the liver, either concomitant to a local inflammation cue (Ad Cre i.v.) or following  
411 a peripheral immunization (Ad Cre i.m. + Tamoxifen), mediates the hepatic recruitment of  
412 antigen-specific CD4<sup>+</sup> T cells. This raises the question of the first site of the immune reactivity  
413 against the antigen in AIH, either within the liver or peripherally. The previous studies using  
414 AIH mouse models did not allow to conclude on this point. In our model, we observed a weak  
415 HA expression in the spleen after Ad Cre i.v. injection which could be the source of a peripheral  
416 immunisation. Thus, a concomitant antigen expression in the liver with the hepatic

417 inflammation could explain the local accumulation and expansion of CD4<sup>+</sup> T cells after  
418 peripheral generation.

419 Despite autoreactive response development, the HA-specific CD4<sup>+</sup> T cell infiltrate in the  
420 liver disappears over time concurrently to hepatitis resolution, demonstrating a control of the  
421 autoreactive CD4<sup>+</sup> T cell population in the liver allowing a long-term tolerance of antigen  
422 expression. However, the humoral response and frequency of peripheral antigen-specific CD4<sup>+</sup>  
423 T cells are not affected in our model, despite the persistent expression of the HA antigen in the  
424 liver. These data suggest the HA specific immune response is only controlled locally and that  
425 additional immune events may be required within the liver to trigger a chronic hepatitis in this  
426 model.

427 To conclude, autoreactive CD4<sup>+</sup> T cells are central to the immunopathogenesis of AIH.  
428 These are recruited in the liver following hepatic antigen exposure and mediate hepatic  
429 damages. In mice, a local control of this cellular autoreactive response rapidly emerges  
430 allowing a long-term tolerance of antigen expression, without chronic hepatitis. However, a  
431 pool of autoreactive CD4<sup>+</sup> T cell persists in the spleen and could represent an active precursor  
432 of a chronic hepatitis. This murine model can be presented as an interesting pre-clinical model  
433 for the analysis of immunomodulatory molecules and pathways implicated in the local control  
434 of autoreactive CD4<sup>+</sup> T cells. The identification of potential extrinsic factors implicated in an  
435 acute-to-chronic transition could provide a better understanding of AIH initiation mechanisms  
436 and unveil new therapeutical targets to dampen immunopathogenesis of autoreactive CD4<sup>+</sup> T  
437 cells in the liver of patients.



## 438 **Abbreviations**

439 AIH: autoimmune hepatitis; ALT: alanine transaminase; AST: aspartate transaminase;  
440 CYP2D6 : cytochrome P450 2D6; FTCD: Formiminotransferase cyclodeaminase; HA:  
441 hemagglutinin; IgG: immunoglobulin G; i.m.: intramuscular; i.v.: intravenous; LC-1 : liver  
442 cytosol 1; LKM-1 : liver kidney microsomal type 1; MHC(-II): (class II) major histocompatibility  
443 complex; NPCs: non-parenchymal cells; SLA : soluble liver antigen; Tregs: regulatory T cells;  
444 TTR : transthyretin

445

## 446 **Acknowledgments**

447 We are grateful to Pr. Liblau and Dr M Vasseur-Cognet for sharing the Rosa26 HA floxed and  
448 the TTR-Cre inducible mice strains.

449 We thank the NIH Tetramer Core Facility (contract number 75N93020D00005) for providing  
450 the class II HA-specific tetramers.

451 We wish to thank the UTE IRS-UN animal facility of the SFR Santé François Bonamy (Nantes  
452 Université, INSERM UAR016, CNRS UAR3556).

453 We acknowledge the IBISA MicroPICell facility (Biogenouest), member of the national  
454 infrastructure France-Bioimaging supported by the French national research agency (ANR-10-  
455 INBS-04).

456

## 457 **Fundings**

458 This work was supported by institutional grants from INSERM and Nantes Université to the  
459 Center for Research in Transplantation and Translational Immunology (CR2TI). This work was  
460 funded by the “Ministère de l’Enseignement supérieur, de la Recherche et de l’Innovation” and  
461 was supported by the “Fondation pour la Recherche Médicale” (grant number  
462 FDT202106013211) to Anaïs Cardon. It has been also carried out thanks to the support of the  
463 LabEx IGO project (n° ANR-11-LABX-0016-01) funded by the “Investissements d’Avenir”  
464 French Government program, managed by the French National Research Agency (ANR). This  
465 work was also supported by the patient association “Association pour la lutte contre les  
466 maladies inflammatoires du foie et des voies biliaires” (ALBI) and by “Association Française  
467 pour l’Étude du Foie-Société Française d’Hépatologie” (AFEF).

468 **Conflicts of interest**

469 Authors declare no conflicts of interest.

470

471 **References**

- 472 1. Kubes, P. & Jenne, C. Immune Responses in the Liver. *Annu. Rev. Immunol.* 36, 247–277  
473 (2018).
- 474 2. Bénéchet, A. P. *et al.* Dynamics and genomic landscape of CD8+ T cells undergoing  
475 hepatic priming. *Nature* 574, 200–205 (2019).
- 476 3. Wherry, E. J., Blattman, J. N., Murali-Krishna, K., van der Most, R. & Ahmed, R. Viral  
477 Persistence Alters CD8 T-Cell Immunodominance and Tissue Distribution and Results in  
478 Distinct Stages of Functional Impairment. *J. Virol.* 77, 4911–4927 (2003).
- 479 4. Carambia, A. *et al.* TGF- $\beta$ -dependent induction of CD4<sup>+</sup>CD25<sup>+</sup>Foxp3<sup>+</sup> Tregs by liver  
480 sinusoidal endothelial cells. *J. Hepatol.* 61, 594–599 (2014).
- 481 5. Heymann, F. *et al.* Liver inflammation abrogates immunological tolerance induced by  
482 Kupffer cells. *Hepatol. Baltim. Md* 62, 279–291 (2015).
- 483 6. Holz, L. E. *et al.* Intrahepatic murine CD8 T-cell activation associates with a distinct  
484 phenotype leading to Bim-dependent death. *Gastroenterology* 135, 989–997 (2008).
- 485 7. Benseler, V. *et al.* Hepatocyte entry leads to degradation of autoreactive CD8 T cells. *Proc.*  
486 *Natl. Acad. Sci.* 108, 16735–16740 (2011).
- 487 8. Cardon, A., Conchon, S. & Renand, A. Mechanisms of autoimmune hepatitis. *Curr. Opin.*  
488 *Gastroenterol.* 37, 79–85 (2021).
- 489 9. Sahebjam, F. & Vierling, J. M. Autoimmune hepatitis. *Front. Med.* 9, 187–219 (2015).
- 490 10. Manns, M. P. *et al.* Diagnosis and management of autoimmune hepatitis. *Hepatology* 51,  
491 2193–2213 (2010).
- 492 11. Francque, S., Vonghia, L., Ramon, A. & Michielsen, P. Epidemiology and treatment of  
493 autoimmune hepatitis. *Hepatic Med. Evid. Res.* 4, 1–10 (2012).
- 494 12. Renand, A. *et al.* Immune Alterations in Patients With Type 1 Autoimmune Hepatitis Persist  
495 Upon Standard Immunosuppressive Treatment. *Hepatol. Commun.* 2, 968–981 (2018).
- 496 13. Behfarjam, F., Nasser-Moghaddam, S. & Jadali, Z. Enhanced Th17 Responses in Patients  
497 with Autoimmune Hepatitis. *Middle East J. Dig. Dis.* 11, 98–103 (2019).
- 498 14. Bovensiepen, C. S. *et al.* TNF-Producing Th1 Cells Are Selectively Expanded in Liver  
499 Infiltrates of Patients with Autoimmune Hepatitis. *J. Immunol. Baltim. Md* 1950 203, 3148–  
500 3156 (2019).
- 501 15. Liang, M., Liwen, Z., Yun, Z., Yanbo, D. & Jianping, C. The Imbalance between  
502 Foxp3<sup>+</sup>Tregs and Th1/Th17/Th22 Cells in Patients with Newly Diagnosed Autoimmune  
503 Hepatitis. *Journal of Immunology Research* vol. 2018 e3753081  
504 <https://www.hindawi.com/journals/jir/2018/3753081/> (2018).

- 505 16. Longhi, M. S. *et al.* Impairment of CD4+CD25+ regulatory T-cells in autoimmune liver  
506 disease. *J. Hepatol.* 41, 31–37 (2004).
- 507 17. Oo, Y. H. *et al.* Liver homing of clinical grade Tregs after therapeutic infusion in patients  
508 with autoimmune hepatitis. *JHEP Rep. Innov. Hepatol.* 1, 286–296 (2019).
- 509 18. Peiseler, M. *et al.* FOXP3+ regulatory T cells in autoimmune hepatitis are fully functional  
510 and not reduced in frequency. *J. Hepatol.* 57, 125–132 (2012).
- 511 19. Renand, A. *et al.* Integrative molecular profiling of autoreactive CD4 T cells in autoimmune  
512 hepatitis. *J. Hepatol.* 73, 1379–1390 (2020).
- 513 20. Hardtke-Wolenski, M. *et al.* Genetic predisposition and environmental danger signals  
514 initiate chronic autoimmune hepatitis driven by CD4+ T cells. *Hepatol. Baltim. Md* 58, 718–  
515 728 (2013).
- 516 21. Holdener, M. *et al.* Breaking tolerance to the natural human liver autoantigen cytochrome  
517 P450 2D6 by virus infection. *J. Exp. Med.* 205, 1409–1422 (2008).
- 518 22. Tannour-Louet, M., Porteu, A., Vaulont, S., Kahn, A. & Vasseur-Cognet, M. A tamoxifen-  
519 inducible chimeric Cre recombinase specifically effective in the fetal and adult mouse liver.  
520 *Hepatol. Baltim. Md* 35, 1072–1081 (2002).
- 521 23. Saxena, A. *et al.* Cutting edge: Multiple sclerosis-like lesions induced by effector CD8 T  
522 cells recognizing a sequestered antigen on oligodendrocytes. *J. Immunol. Baltim. Md* 1950  
523 181, 1617–1621 (2008).
- 524 24. Le Guen, V. *et al.* Alloantigen gene transfer to hepatocytes promotes tolerance to  
525 pancreatic islet graft by inducing CD8(+) regulatory T cells. *J. Hepatol.* 66, 765–777 (2017).
- 526

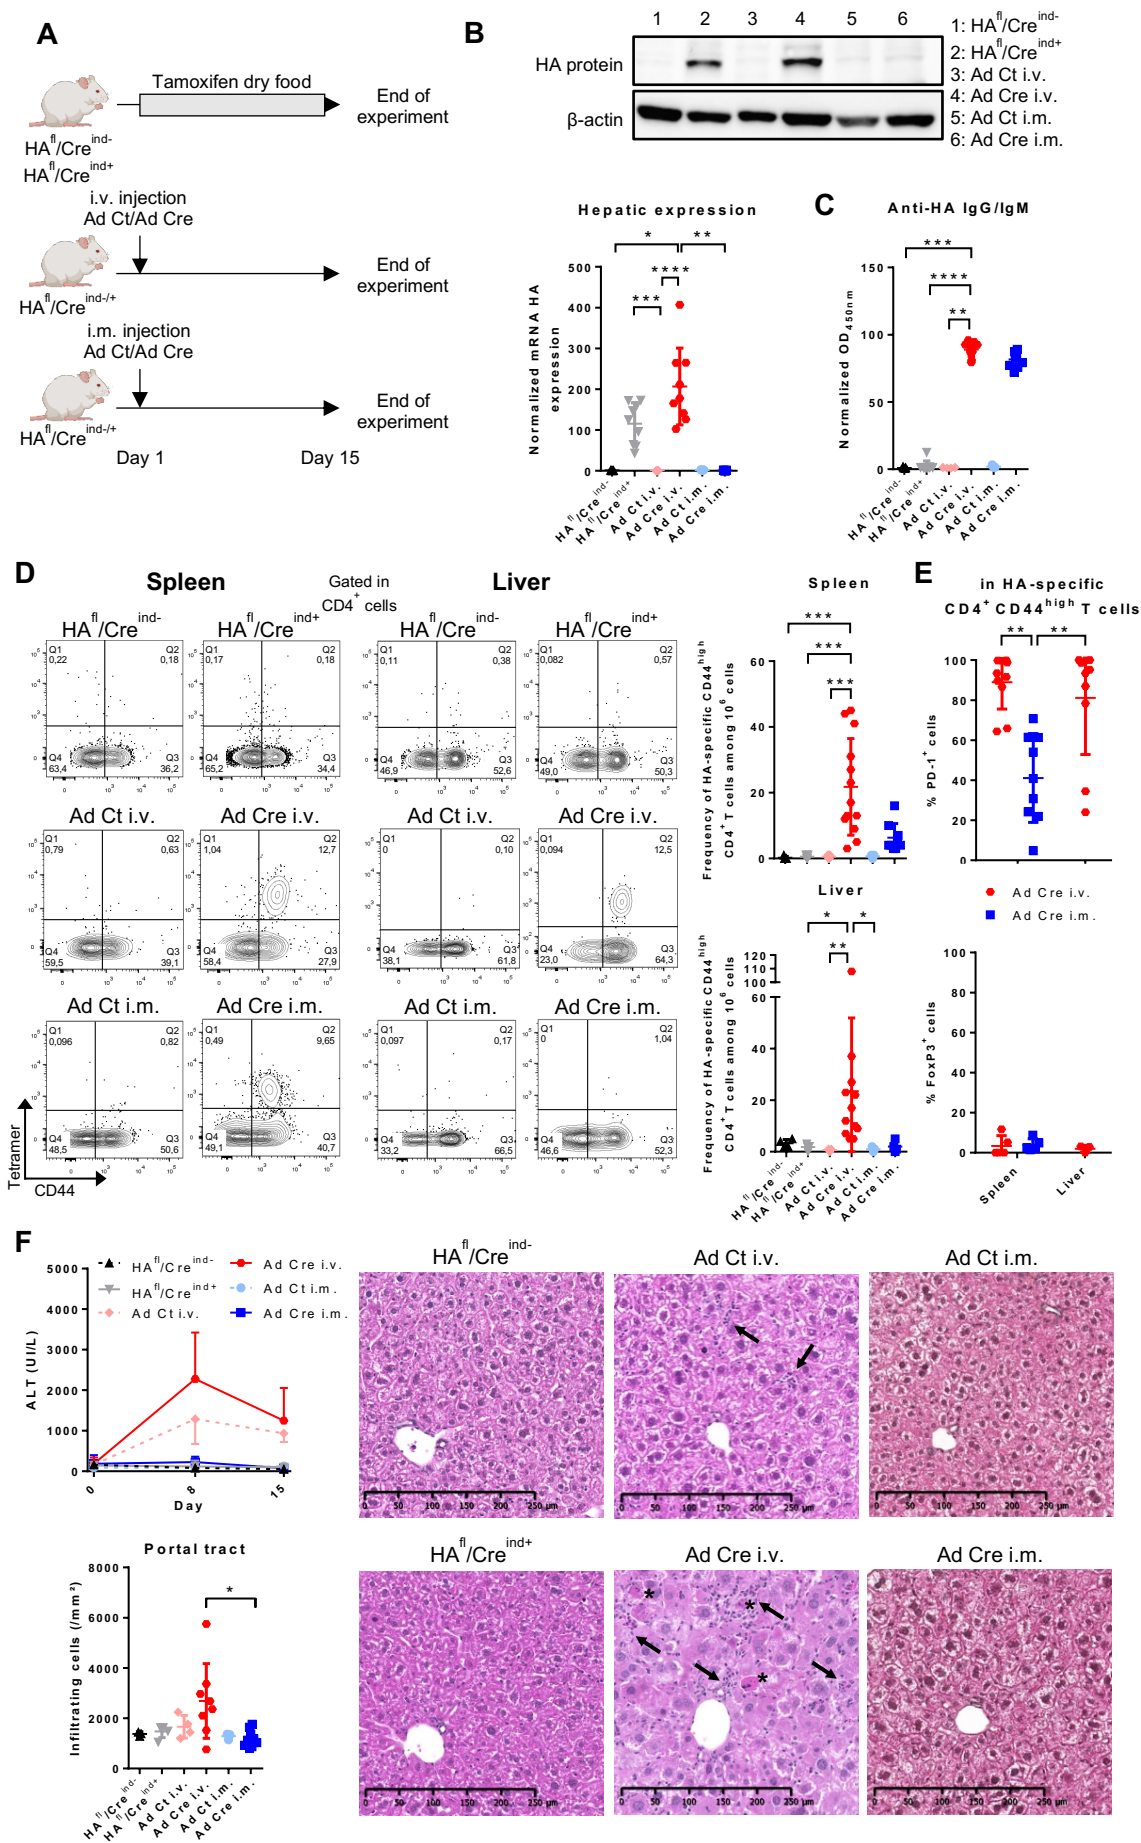

**Figure 1 : Antigen-specific CD4<sup>+</sup> T cell response is modulated not only by the localisation of antigen expression but also by the environment.** (A) HA<sup>fl</sup>/Cre<sup>ind<sup>-</sup></sup> mice (n = 5) and HA<sup>fl</sup>/Cre<sup>ind<sup>+</sup></sup> mice (n = 9) are fed with tamoxifen dry food (0,5g/kg) for 14 days. HA<sup>fl</sup>/Cre<sup>ind<sup>-/+</sup></sup> mice receive a single i.v. injection (3.10<sup>9</sup> ip) of Ad Ct (n = 7) or Ad Cre (n = 13). HA<sup>fl</sup>/Cre<sup>ind<sup>-/+</sup></sup> mice receive a single i.m. injection (1,5.10<sup>9</sup> ip) of Ad Ct (n = 3) or Ad Cre (n = 9). Mice are sacrificed at day 15. (B) Quantitative RT-PCR analysis of HA mRNA expression in liver samples. Total protein from liver samples were incubated on western blot membranes with anti-HA antibodies to detect HA protein expression.  $\beta$ -actine was used as loading control. (C) At the end of experiment, sera were diluted and assayed for anti-HA IgG and IgM. (D) Total splenocytes and liver NPCs are stained with a MHC class II tetramer loaded with HA peptide before a tetramer enrichment step. Cells are stained (Live/Dead Aqua, CD4, CD44, PD-1, CD25, FoxP3, CD19) and analysed by flow cytometry. Representative MHC class II/HA peptide tetramer and CD44 co-staining, gated in live CD19<sup>-</sup> CD4<sup>+</sup> cells. Frequency of HA-specific CD4<sup>+</sup> CD44<sup>high</sup> T cells are calculated among 10<sup>6</sup> total cells. (E) Percentage of PD-1<sup>+</sup> and FoxP3<sup>+</sup> cells in HA-specific CD4<sup>+</sup> CD44<sup>high</sup> T cells are represented. (F) Plasma samples were collected before the start of the experiment and at day 8 and day 15 for dosage of ALT. At the end of the experiment, paraffin-embedded liver sections are stained with HPS coloration to analyse liver infiltration (count of infiltrating cells around portal tracts) and morphology (x10 ; arrows point lymphocytic infiltration ; stars point necroinflammatory activities). All results are normalized and represent the mean (+ SD). p values were calculated using non-parametric Kruskal-Wallis test, \* = p <0.05, \*\* = p <0.01, \*\*\* = p <0.001, \*\*\*\* = p < 0.0001.

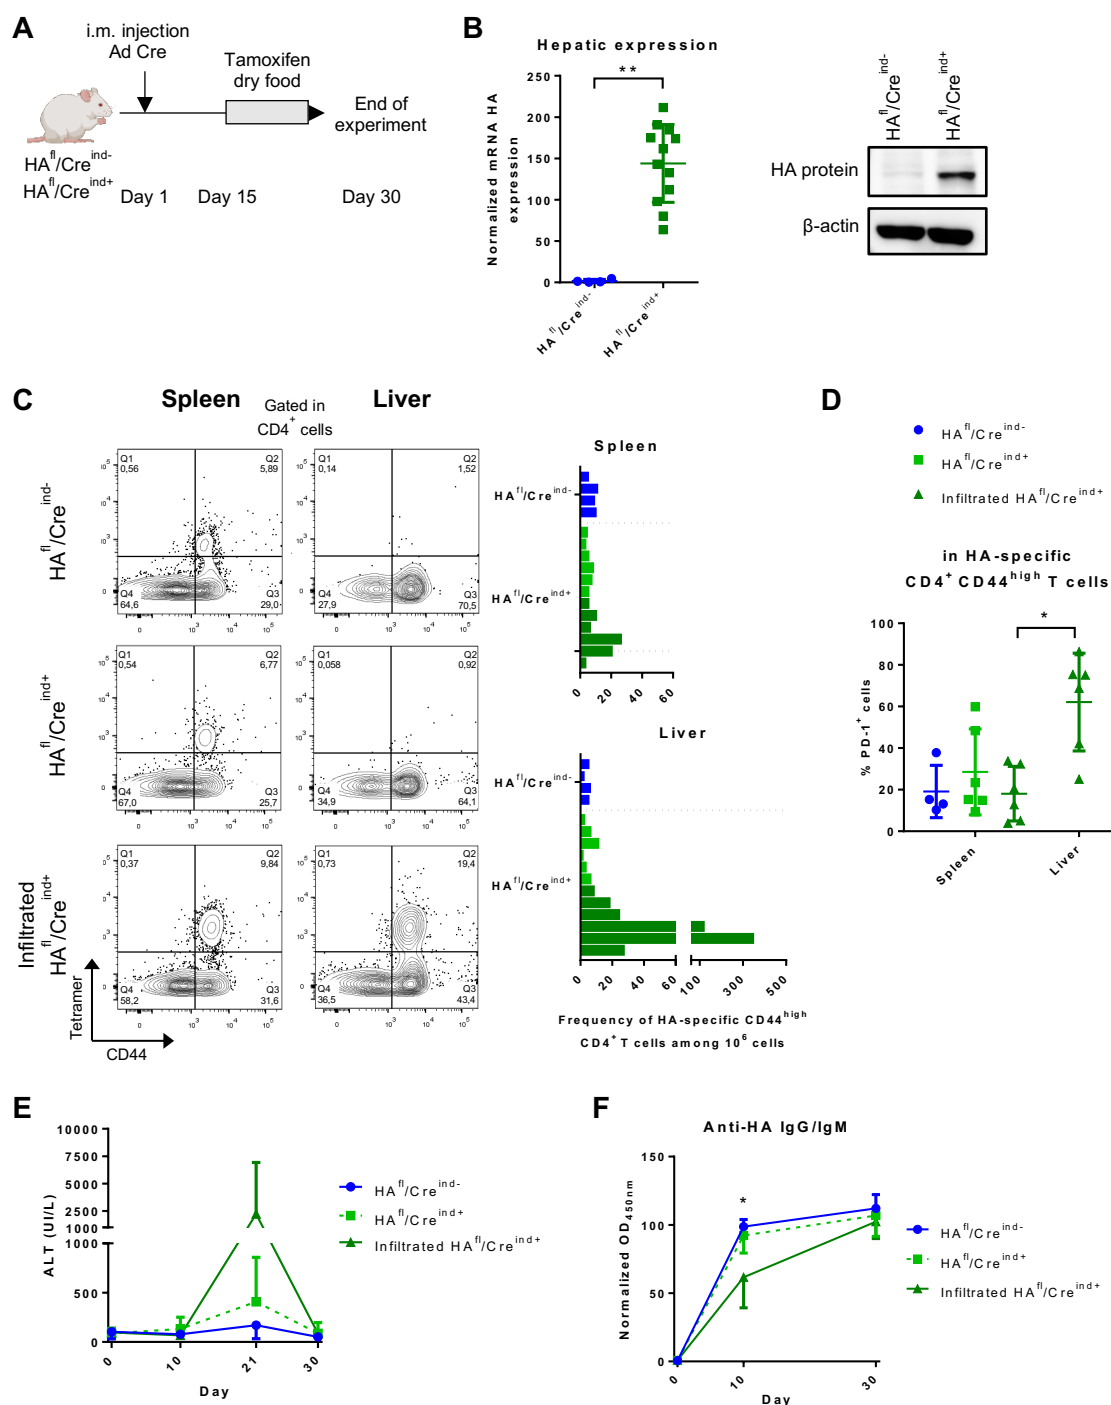

**Figure 2 : Induction of antigen expression in the liver of pre-immunized mice leads to intra-hepatic recruitment of antigen-specific CD4<sup>+</sup> T cells.** (A) HA<sup>fl</sup>/Cre<sup>ind-</sup> mice (n = 4) and HA<sup>fl</sup>/Cre<sup>ind+</sup> mice (n = 12) receive a single i.m. injection of Ad Cre (1,5.10<sup>9</sup> ip). From day 15 to day 30, mice are fed with tamoxifen dry food (0,5g/kg). Mice are sacrificed at day 30. (B) Quantitative RT-PCR analysis of HA mRNA expression in liver samples. Total protein from liver samples were incubated on western blot membranes with anti-HA antibodies to detect HA protein expression.  $\beta$ -actine was used as loading control. (C) Total splenocytes and liver NPCs are stained with a MHC class II tetramer loaded with HA peptide before a tetramer enrichment step. Cells are stained (Live/Dead Aqua, CD4, CD44, PD-1, CD25, CD19) and analysed by flow cytometry. Representative MHC class II/HA peptide tetramer and CD44 co-staining, gated in live CD19<sup>-</sup> CD4<sup>+</sup> cells. Frequency of HA-specific CD4<sup>+</sup> CD44<sup>high</sup> T cells are calculated among 10<sup>6</sup> total cells (grey and black bars respectively represent HA<sup>fl</sup>/Cre<sup>ind+</sup> mice without or with antigen-specific CD4<sup>+</sup> CD44<sup>high</sup> T cells infiltration in the liver). (D) Percentage of PD-1<sup>+</sup> cells in HA-specific CD4<sup>+</sup> CD44<sup>high</sup> T cells are represented. (E) Plasma samples were collected before the start of the experiment and at days 10, 21 and 30 for dosage of ALT. (F) Before the start of experiment, at day 10 and at the end of experiment, sera were diluted and assayed for anti-HA IgG and IgM. All results are normalized and represent the mean (+ SD). p values were calculated using non-parametric Kruskal-Wallis test or one-way ANOVA, ns = no significance, \* = p <0.05, \*\* = p <0.01.

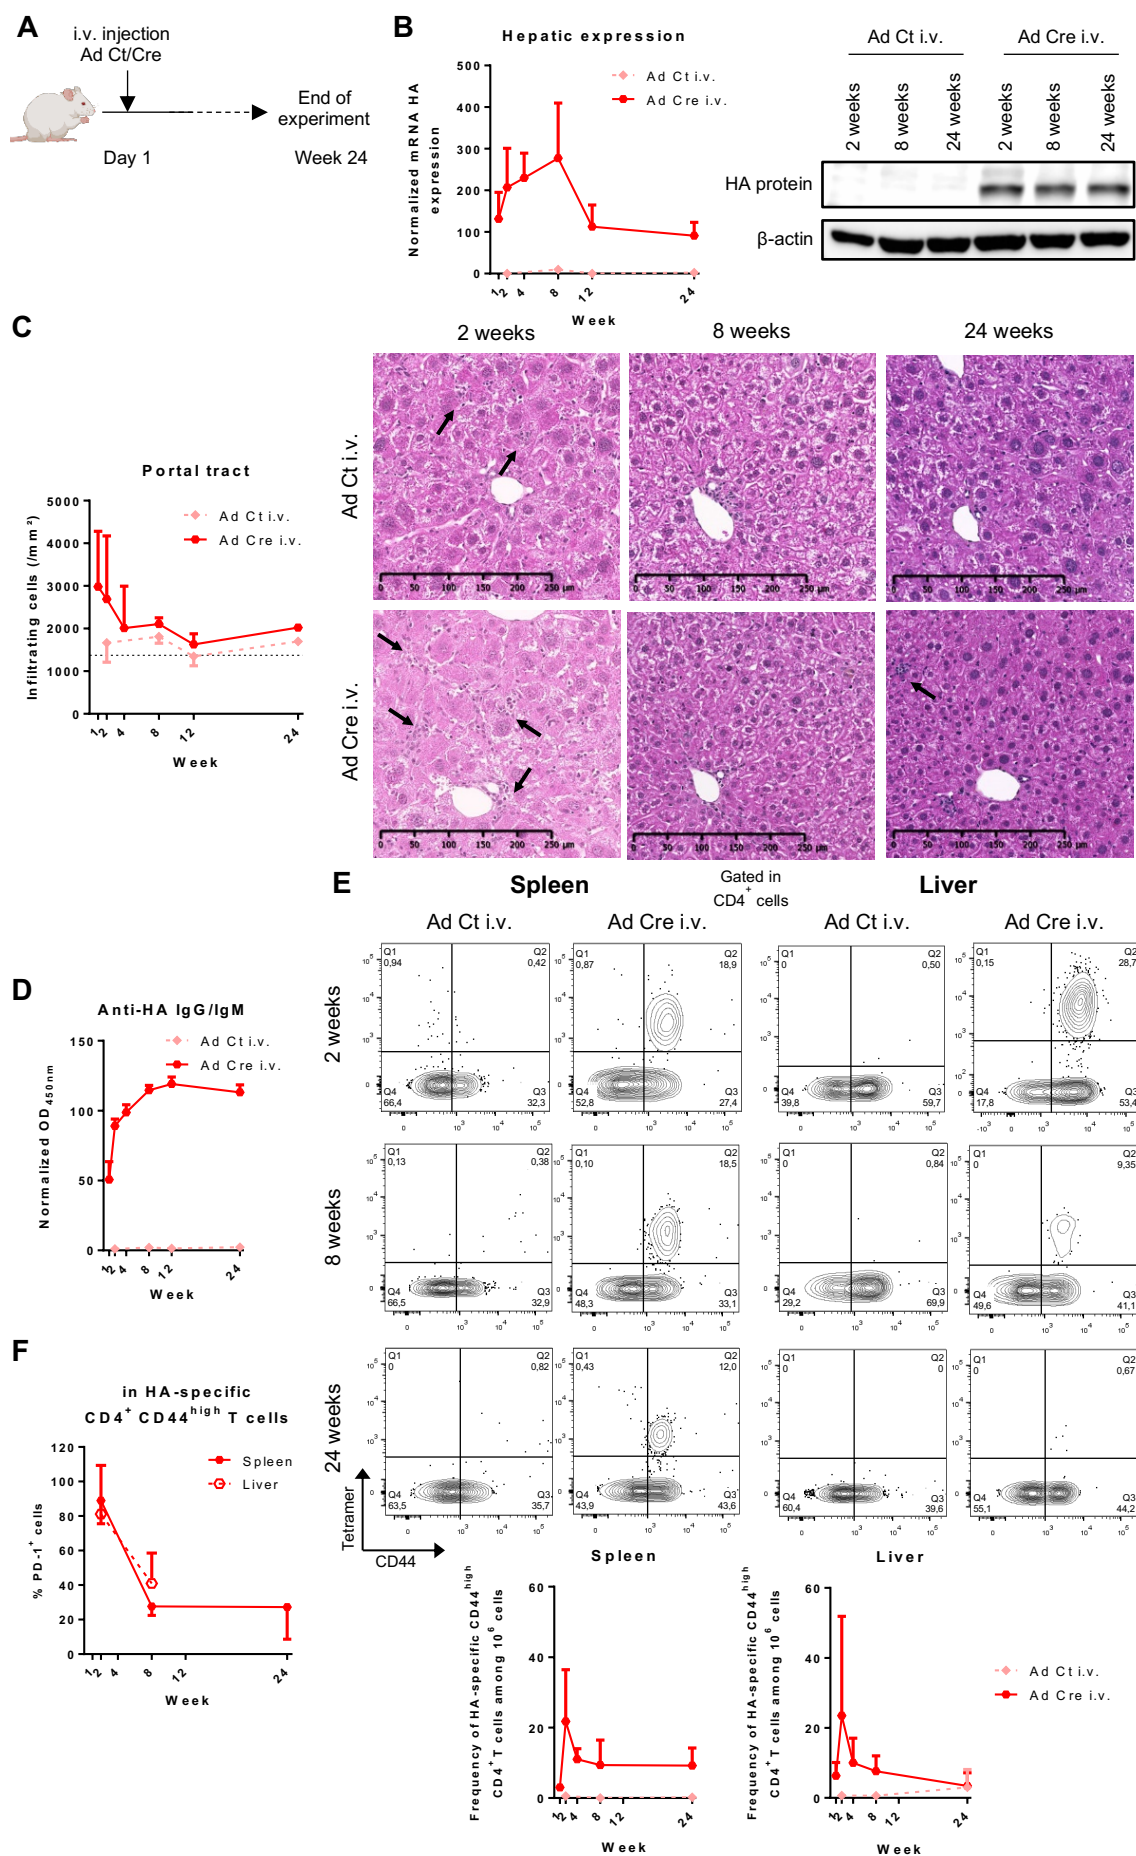



**Figure 3 : Induction of an antigen expression in the liver with concomitant inflammation using an adenoviral vector induces a chronic antigen-specific response.**

(A) HA<sup>fl</sup>/Cre<sup>ind/+</sup> mice receive a single i.v. injection ( $3.10^9$  ip) of Ad Ct or Ad Cre. Mice are sacrificed at week 1 (Ad Cre n = 3), 2 (Ad Ct n = 7 ; Ad Cre n = 13), 4 (Ad Cre n = 3), 8 (Ad Ct n = 8 ; Ad Cre n = 12), 12 (Ad Ct n = 3 ; Ad Cre n = 6) and 24 (Ad Ct n = 5 ; Ad Cre n = 9). (B) Quantitative RT-PCR analysis of HA mRNA expression in liver samples. Total protein from liver samples were incubated on western blot membranes with anti-HA antibodies to detect HA protein expression.  $\beta$ -actine was used as loading control. (C) For each time point, paraffin-embedded liver sections are stained with HPS coloration to analyse liver infiltration (count of infiltrating cells around portal tracts ; dotted line represent a basal infiltration in a naïve HA<sup>fl</sup>/Cre<sup>ind/+</sup> mice) and morphology (x10 ; arrows point lymphocytic infiltration). (D) For each time point, sera were diluted and assayed for anti-HA IgG and IgM. (E) Total splenocytes and liver NPCs are stained with a MHC class II tetramer loaded with HA peptide before a tetramer enrichment step. Cells are stained (Live/Dead Aqua, CD4, CD44, PD-1, CD25 CD19) and analysed by flow cytometry. Representative MHC class II/HA peptide tetramer and CD44 co-staining, gated in live CD19<sup>-</sup> CD4<sup>+</sup> cells. Frequency of HA-specific CD4<sup>+</sup> CD44<sup>high</sup> T cells are calculated among  $10^6$  total cells. (F) Percentage of PD-1<sup>+</sup> cells in HA-specific CD4<sup>+</sup> CD44<sup>high</sup> T cells are represented. All results are normalized and represent the mean (+ SD).
